# Supplementary material for: Protein microarray analysis of cytokine expression changes in distal stumps after sciatic nerve transection
Source: PubMed Central journal article supplement — Neural Regen Res. 2019 Sep 26;15(3):503–11. doi: 10.4103/1673-5374.266062 (PMC6921340; doi:10.4103/1673-5374.266062), 2019-09-26
Supplement: NRR-15-503_Suppl1.pdf [file NRR-15-503_Suppl1.pdf]

| Category         | Term                                                                    | Count | %          | P-value  | Molecules                                                                             | List total | Pop hits | Pop total | Fold enrichment | Bonferroni | Benjamini  | FDR        |
|------------------|-------------------------------------------------------------------------|-------|------------|----------|---------------------------------------------------------------------------------------|------------|----------|-----------|-----------------|------------|------------|------------|
| <b>Day 1</b>     |                                                                         |       |            |          |                                                                                       |            |          |           |                 |            |            |            |
| GOTERM_BP_DIRECT | GO:0006954~inflammatory response                                        | 13    | 0.33121019 | 1.17E-15 | CCL2, PPBP, CXCL13, IL19, CXCL2, CXCL9, JAK2, NGFR, CXCL11, IL10, CCL17, IL20, CXCL10 | 26         | 187      | 11368     | 30.3957219      | 3.22E-13   | 3.22E-13   | 1.60E-12   |
| GOTERM_BP_DIRECT | GO:0070098~chemokine-mediated signaling pathway                         | 8     | 0.20382166 | 9.77E-13 | CCL2, PPBP, CXCL13, CXCL2, CXCL9, CXCL11, CCL17, CXCL10                               | 26         | 37       | 11368     | 94.5363825      | 2.58E-10   | 1.29E-10   | 1.28E-09   |
| GOTERM_BP_DIRECT | GO:0006955~immune response                                              | 11    | 0.28025478 | 5.33E-12 | PPBP, CXCL13, IL19, CXCL2, CXCL9, NGFR, CXCL11, IL10, CCL17, IL20, CXCL10             | 26         | 198      | 11368     | 24.2905983      | 1.41E-09   | 4.69E-10   | 6.99E-09   |
| GOTERM_BP_DIRECT | GO:0042127~regulation of cell proliferation                             | 8     | 0.20382166 | 4.74E-09 | PPBP, CXCL13, CXCL2, CXCL9, JAK2, NGFR, CXCL11, CXCL10                                | 26         | 119      | 11368     | 29.3936652      | 1.25E-06   | 3.13E-07   | 6.21E-06   |
| GOTERM_BP_DIRECT | GO:0032496~response to lipopolysaccharide                               | 7     | 0.17834395 | 9.15E-09 | PPBP, CXCL13, CXCL2, CXCL9, NGFR, CXCL11, CXCL10                                      | 26         | 73       | 11368     | 41.9262381      | 2.41E-06   | 4.83E-07   | 1.20E-05   |
| GOTERM_BP_DIRECT | GO:0002690~positive regulation of leukocyte                             | 5     | 0.12738854 | 1.28E-08 | PPBP, CXCL13, CXCL9, CXCL11, CXCL10                                                   | 26         | 13       | 11368     | 168.16568       | 3.39E-06   | 5.65E-07   | 1.68E-05   |
| GOTERM_BP_DIRECT | GO:0046427~positive regulation of JAK-STAT cascade                      | 4     | 0.10191083 | 1.12E-06 | IL4, IL19, IL10, IL20                                                                 | 26         | 10       | 11368     | 174.892308      | 2.95E-04   | 4.21E-05   | 0.00146234 |
| GOTERM_BP_DIRECT | GO:0048010~vascular endothelial growth factor receptor signaling        | 4     | 0.10191083 | 2.65E-06 | VEGFB, NRP1, PGF, VEGFA                                                               | 26         | 13       | 11368     | 134.532544      | 6.99E-04   | 8.74E-05   | 0.00347007 |
| GOTERM_BP_DIRECT | GO:2001237~negative regulation of extrinsic apoptotic signaling pathway | 4     | 0.10191083 | 2.65E-05 | IL4, NRP1, LGALS3, IL19                                                               | 26         | 27       | 11368     | 64.7749288      | 0.00698261 | 7.78E-04   | 0.03477005 |
| GOTERM_BP_DIRECT | GO:0030816~positive regulation of cAMP metabolic                        | 3     | 0.07643312 | 2.78E-05 | CXCL9, CXCL11, CXCL10                                                                 | 26         | 4        | 11368     | 327.923077      | 0.00730833 | 7.33E-04   | 0.03639767 |
| GOTERM_BP_DIRECT | GO:0060754~positive regulation of mast cell                             | 3     | 0.07643312 | 6.93E-05 | VEGFB, PGF, VEGFA                                                                     | 26         | 6        | 11368     | 218.615385      | 0.01812264 | 0.00166124 | 0.09072611 |
| GOTERM_BP_DIRECT | GO:0030593~neutrophil chemotaxis                                        | 4     | 0.10191083 | 8.80E-05 | CCL2, PPBP, LGALS3, CCL17                                                             | 26         | 40       | 11368     | 43.7230769      | 0.022959   | 0.00193368 | 0.11520704 |
| GOTERM_BP_DIRECT | GO:0043950~positive regulation of cAMP-mediated signaling               | 3     | 0.07643312 | 9.69E-05 | CXCL9, CXCL11, CXCL10                                                                 | 26         | 7        | 11368     | 187.384615      | 0.02524609 | 0.00196501 | 0.1268241  |
| GOTERM_BP_DIRECT | GO:0060326~cell chemotaxis                                              | 4     | 0.10191083 | 2.05E-04 | CXCL2, CXCL11, CCL17, CXCL10                                                          | 26         | 53       | 11368     | 32.9985486      | 0.0526111  | 0.00385296 | 0.26786786 |

|                  |                                                                                   |   |            |            |                                                         |    |     |       |            |            |            |            |
|------------------|-----------------------------------------------------------------------------------|---|------------|------------|---------------------------------------------------------|----|-----|-------|------------|------------|------------|------------|
| GOTERM_BP_DIRECT | GO:0050930~induction of positive chemotaxis                                       | 3 | 0.07643312 | 2.07E-04   | VEGFB, PGF, VEGFA                                       | 26 | 10  | 11368 | 131.169231 | 0.05311255 | 0.00363173 | 0.2704884  |
| GOTERM_BP_DIRECT | GO:0051281~positive regulation of release of sequestered calcium ion into cytosol | 3 | 0.07643312 | 6.19E-04   | CXCL9, CXCL11, CXCL10                                   | 26 | 17  | 11368 | 77.158371  | 0.15076732 | 0.01016189 | 0.80778032 |
| GOTERM_BP_DIRECT | GO:0001525~angiogenesis                                                           | 4 | 0.10191083 | 0.00110368 | VEGFB, NRP1, PGF, VEGFA                                 | 26 | 94  | 11368 | 18.6055646 | 0.25288205 | 0.01700275 | 1.43645183 |
| GOTERM_BP_DIRECT | GO:0007186~G-protein coupled receptor signaling pathway                           | 8 | 0.20382166 | 0.00123718 | CCL2, PPBP, CXCL13, CXCL2, CXCL9, CXCL11, CCL17, CXCL10 | 26 | 793 | 11368 | 4.41090309 | 0.27878462 | 0.01799269 | 1.60890525 |
| GOTERM_BP_DIRECT | GO:0002548~monocyte chemotaxis                                                    | 3 | 0.07643312 | 0.00124407 | CCL2, LGALS3, CCL17                                     | 26 | 24  | 11368 | 54.6538462 | 0.28009788 | 0.01714811 | 1.61780467 |
| GOTERM_BP_DIRECT | GO:0070374~positive regulation of ERK1 and ERK2                                   | 4 | 0.10191083 | 0.00151909 | ICAM1, CCL2, NRP1, CCL17                                | 26 | 105 | 11368 | 16.6564103 | 0.33058029 | 0.0198672  | 1.9721561  |
| GOTERM_BP_DIRECT | GO:0001938~positive regulation of endothelial cell proliferation                  | 3 | 0.07643312 | 0.00294993 | VEGFB, PGF, VEGFA                                       | 26 | 37  | 11368 | 35.4511435 | 0.54156324 | 0.03645844 | 3.79683399 |
| GOTERM_BP_DIRECT | GO:0001666~response to hypoxia                                                    | 3 | 0.07643312 | 0.00642036 | VEGFB, PGF, VEGFA                                       | 26 | 55  | 11368 | 23.848951  | 0.8173967  | 0.07438111 | 8.09295193 |
| GOTERM_BP_DIRECT | GO:0010818~T cell chemotaxis                                                      | 2 | 0.05095541 | 0.0087688  | CXCL11, CXCL10                                          | 26 | 4   | 11368 | 218.615385 | 0.90223344 | 0.09615235 | 10.8988431 |
| GOTERM_BP_DIRECT | GO:0045766~positive regulation of angiogenesis                                    | 3 | 0.07643312 | 0.00913799 | VEGFB, PGF, VEGFA                                       | 26 | 66  | 11368 | 19.8741259 | 0.91139069 | 0.09604883 | 11.3326753 |
| GOTERM_BP_DIRECT | GO:0043524~negative regulation of neuron apoptotic process                        | 3 | 0.07643312 | 0.0096786  | CCL2, NRP1, NGF                                         | 26 | 68  | 11368 | 19.2895928 | 0.92328016 | 0.09760577 | 11.9644287 |
| GOTERM_BP_DIRECT | GO:0045348~positive regulation of MHC class II biosynthetic process               | 2 | 0.05095541 | 0.01094944 | IL4, IL10                                               | 26 | 5   | 11368 | 174.892308 | 0.9453384  | 0.10576983 | 13.4331889 |
| GOTERM_BP_DIRECT | GO:0051045~negative regulation of membrane protein ectodomain proteolysis         | 2 | 0.05095541 | 0.01094944 | IL10, TIMP1                                             | 26 | 5   | 11368 | 174.892308 | 0.9453384  | 0.10576983 | 13.4331889 |
| GOTERM_BP_DIRECT | GO:0048246~macrophage chemotaxis                                                  | 2 | 0.05095541 | 0.01312547 | CCL2, LGALS3                                            | 26 | 6   | 11368 | 145.74359  | 0.96944009 | 0.12119095 | 15.8956629 |

|                  |                                                                             |   |            |            |               |    |    |       |            |            |            |            |
|------------------|-----------------------------------------------------------------------------|---|------------|------------|---------------|----|----|-------|------------|------------|------------|------------|
| GOTERM_BP_DIRECT | GO:0050918~positive chemotaxis                                              | 2 | 0.05095541 | 0.01746376 | NRP1, VEGFA   | 26 | 8  | 11368 | 109.307692 | 0.99044953 | 0.1530495  | 20.613067  |
| GOTERM_BP_DIRECT | GO:0090280~positive regulation of calcium ion import                        | 2 | 0.05095541 | 0.01962603 | CCL2, LGALS3  | 26 | 9  | 11368 | 97.1623932 | 0.9946614  | 0.16509812 | 22.8718911 |
| GOTERM_BP_DIRECT | GO:0035729~cellular response to hepatocyte growth factor stimulus           | 2 | 0.05095541 | 0.01962603 | NRP1, IL10    | 26 | 9  | 11368 | 97.1623932 | 0.9946614  | 0.16509812 | 22.8718911 |
| GOTERM_BP_DIRECT | GO:0002042~cell migration involved in sprouting angiogenesis                | 2 | 0.05095541 | 0.02393688 | NRP1, VEGFA   | 26 | 11 | 11368 | 79.4965035 | 0.99833211 | 0.19201079 | 27.1991104 |
| GOTERM_BP_DIRECT | GO:0042832~defense response to protozoan                                    | 2 | 0.05095541 | 0.02393688 | IL4, IL10     | 26 | 11 | 11368 | 79.4965035 | 0.99833211 | 0.19201079 | 27.1991104 |
| GOTERM_BP_DIRECT | GO:1901741~positive regulation of myoblast fusion                           | 2 | 0.05095541 | 0.03036904 | IL4, CXCL9    | 26 | 14 | 11368 | 62.4615385 | 0.99970886 | 0.2309776  | 33.2402962 |
| GOTERM_BP_DIRECT | GO:0090026~positive regulation of monocyte                                  | 2 | 0.05095541 | 0.03250404 | CCL2, CXCL10  | 26 | 15 | 11368 | 58.2974359 | 0.9998373  | 0.23861282 | 35.1408238 |
| GOTERM_BP_DIRECT | GO:0042517~positive regulation of tyrosine phosphorylation of Stat3 protein | 2 | 0.05095541 | 0.03676051 | IL6ST, JAK2   | 26 | 17 | 11368 | 51.438914  | 0.9999492  | 0.2589044  | 38.7815734 |
| GOTERM_BP_DIRECT | GO:2000352~negative regulation of endothelial cell apoptotic process        | 2 | 0.05095541 | 0.03676051 | IL4, ICAM1    | 26 | 17 | 11368 | 51.438914  | 0.9999492  | 0.2589044  | 38.7815734 |
| GOTERM_BP_DIRECT | GO:0045662~negative regulation of myoblast differentiation                  | 2 | 0.05095541 | 0.038882   | CCL17, CXCL10 | 26 | 18 | 11368 | 48.5811966 | 0.99997162 | 0.2650357  | 40.5248054 |
| GOTERM_BP_DIRECT | GO:0048247~lymphocyte chemotaxis                                            | 2 | 0.05095541 | 0.040999   | CCL2, CCL17   | 26 | 19 | 11368 | 46.0242915 | 0.99998414 | 0.27077125 | 42.218545  |
| GOTERM_BP_DIRECT | GO:0030155~regulation of cell                                               | 2 | 0.05095541 | 0.05151702 | ICAM1, JAK2   | 26 | 24 | 11368 | 36.4358974 | 0.99999914 | 0.32149982 | 49.9925309 |
| GOTERM_BP_DIRECT | GO:0051781~positive regulation of cell division                             | 2 | 0.05095541 | 0.05151702 | PPBP, VEGFA   | 26 | 24 | 11368 | 36.4358974 | 0.99999914 | 0.32149982 | 49.9925309 |

|                  |                                                                           |   |            |            |                                               |    |     |       |            |            |            |            |
|------------------|---------------------------------------------------------------------------|---|------------|------------|-----------------------------------------------|----|-----|-------|------------|------------|------------|------------|
| GOTERM_BP_DIRECT | GO:0010951~negative regulation of endopeptidase activity                  | 2 | 0.05095541 | 0.05569315 | TIMP1, NGF                                    | 26 | 26  | 11368 | 33.6331361 | 0.99999973 | 0.33560112 | 52.8017732 |
| GOTERM_BP_DIRECT | GO:0071346~cellular response to interferon-gamma                          | 2 | 0.05095541 | 0.05985162 | CCL2, CCL17                                   | 26 | 28  | 11368 | 31.2307692 | 0.99999992 | 0.34869333 | 55.4536569 |
| GOTERM_BP_DIRECT | GO:0071347~cellular response to interleukin-1                             | 2 | 0.05095541 | 0.06605638 | CCL2, CCL17                                   | 26 | 31  | 11368 | 28.2084367 | 0.99999999 | 0.370358   | 59.1555262 |
| GOTERM_BP_DIRECT | GO:0050731~positive regulation of peptidyl-tyrosine phosphorylation       | 2 | 0.05095541 | 0.06605638 | NRP1, VEGFA                                   | 26 | 31  | 11368 | 28.2084367 | 0.99999999 | 0.370358   | 59.1555262 |
| GOTERM_BP_DIRECT | GO:0071356~cellular response to tumor necrosis factor                     | 2 | 0.05095541 | 0.08645626 | CCL2, CCL17                                   | 26 | 41  | 11368 | 21.3283302 | 1          | 0.44942856 | 69.4180384 |
| GOTERM_BP_DIRECT | GO:0001934~positive regulation of protein                                 | 2 | 0.05095541 | 0.08645626 | IL4, VEGFA                                    | 26 | 41  | 11368 | 21.3283302 | 1          | 0.44942856 | 69.4180384 |
| GOTERM_BP_DIRECT | GO:0071222~cellular response to lipopolysaccharide                        | 2 | 0.05095541 | 0.09849013 | IL10, CXCL10                                  | 26 | 47  | 11368 | 18.6055646 | 1          | 0.487075   | 74.2953771 |
| GOTERM_BP_DIRECT | GO:0016337~single organismal cell-cell adhesion                           | 2 | 0.05095541 | 0.09849013 | ICAM1, ICAM2                                  | 26 | 47  | 11368 | 18.6055646 | 1          | 0.487075   | 74.2953771 |
| <b>Day 7</b>     |                                                                           |   |            |            |                                               |    |     |       |            |            |            |            |
| GOTERM_BP_DIRECT | GO:0051045~negative regulation of membrane protein ectodomain proteolysis | 5 | 0.07338911 | 4.2252E-10 | TIMP4, TIMP2, TIMP3, IL10, TIMP1              | 37 | 5   | 11368 | 307.243243 | 1.6352E-07 | 1.6352E-07 | 5.865E-07  |
| GOTERM_BP_DIRECT | GO:0043086~negative regulation of catalytic activity                      | 5 | 0.07338911 | 3.9581E-07 | IL7, TIMP4, TIMP2, TIMP3, TIMP1               | 37 | 20  | 11368 | 76.8108108 | 0.00015316 | 7.6585E-05 | 0.00054941 |
| GOTERM_BP_DIRECT | GO:0006955~immune response                                                | 8 | 0.11742257 | 2.3793E-06 | PPBP, IL7, IL19, IL9, CCL5, CCL27, IL10, IL20 | 37 | 198 | 11368 | 12.4138684 | 0.00092037 | 0.00030688 | 0.00330266 |
| GOTERM_BP_DIRECT | GO:0046427~positive regulation of JAK-STAT cascade                        | 4 | 0.05871129 | 3.4472E-06 | IL4, IL19, IL10, IL20                         | 37 | 10  | 11368 | 122.897297 | 0.00133318 | 0.00033346 | 0.00478495 |
| GOTERM_BP_DIRECT | GO:0030593~neutrophil chemotaxis                                          | 5 | 0.07338911 | 7.1369E-06 | CCL2, PPBP, LGALS3, IFNG, CCL5                | 37 | 40  | 11368 | 38.4054054 | 0.00275817 | 0.00055224 | 0.00990623 |

|                  |                                                                             |   |            |            |                                          |    |     |       |            |            |            |            |
|------------------|-----------------------------------------------------------------------------|---|------------|------------|------------------------------------------|----|-----|-------|------------|------------|------------|------------|
| GOTERM_BP_DIRECT | GO:0048010~vascular endothelial growth factor receptor signaling            | 4 | 0.05871129 | 8.1623E-06 | VEGFB, NRP1, PGF, VEGFA                  | 37 | 13  | 11368 | 94.5363825 | 0.00315384 | 0.00052633 | 0.01132949 |
| GOTERM_BP_DIRECT | GO:0006954~inflammatory response                                            | 7 | 0.10274475 | 2.3622E-05 | CCL2, PPBP, IL19, JAK2, CCL5, IL10, IL20 | 37 | 187 | 11368 | 11.501084  | 0.00910031 | 0.00130514 | 0.0327852  |
| GOTERM_BP_DIRECT | GO:2001237~negative regulation of extrinsic apoptotic signaling pathway     | 4 | 0.05871129 | 8.0972E-05 | IL4, NRP1, LGALS3, IL19                  | 37 | 27  | 11368 | 45.5175175 | 0.03085146 | 0.00390951 | 0.1123383  |
| GOTERM_BP_DIRECT | GO:0045348~positive regulation of MHC class II biosynthetic process         | 3 | 0.04403347 | 9.6926E-05 | IL4, IFNG, IL10                          | 37 | 5   | 11368 | 184.345946 | 0.03681731 | 0.00415935 | 0.13445882 |
| GOTERM_BP_DIRECT | GO:0060754~positive regulation of mast cell                                 | 3 | 0.04403347 | 0.0001451  | VEGFB, PGF, VEGFA                        | 37 | 6   | 11368 | 153.621622 | 0.05460974 | 0.00560001 | 0.20122381 |
| GOTERM_BP_DIRECT | GO:0050930~induction of positive chemotaxis                                 | 3 | 0.04403347 | 0.00043184 | VEGFB, PGF, VEGFA                        | 37 | 10  | 11368 | 92.172973  | 0.15393393 | 0.01508129 | 0.59777069 |
| GOTERM_BP_DIRECT | GO:0042832~defense response to protozoan                                    | 3 | 0.04403347 | 0.00052675 | IL4, IFNG, IL10                          | 37 | 11  | 11368 | 83.7936118 | 0.18446167 | 0.01684868 | 0.72870849 |
| GOTERM_BP_DIRECT | GO:0043524~negative regulation of neuron apoptotic process                  | 4 | 0.05871129 | 0.00126911 | CCL2, CNTF, NRP1, GFRAL                  | 37 | 68  | 11368 | 18.073132  | 0.38826524 | 0.03709868 | 1.74731859 |
| GOTERM_BP_DIRECT | GO:0042517~positive regulation of tyrosine phosphorylation of Stat3 protein | 3 | 0.04403347 | 0.00128704 | CNTF, IL6ST, JAK2                        | 37 | 17  | 11368 | 54.2193959 | 0.39250128 | 0.03497413 | 1.77180388 |
| GOTERM_BP_DIRECT | GO:0002548~monocyte chemotaxis                                              | 3 | 0.04403347 | 0.00257581 | CCL2, LGALS3, CCL5                       | 37 | 24  | 11368 | 38.4054054 | 0.63142987 | 0.06437602 | 3.51676177 |
| GOTERM_BP_DIRECT | GO:0030155~regulation of cell                                               | 3 | 0.04403347 | 0.00257581 | ICAM1, JAG2, JAK2                        | 37 | 24  | 11368 | 38.4054054 | 0.63142987 | 0.06437602 | 3.51676177 |
| GOTERM_BP_DIRECT | GO:0001525~angiogenesis                                                     | 4 | 0.05871129 | 0.00320852 | VEGFB, NRP1, PGF, VEGFA                  | 37 | 94  | 11368 | 13.0741806 | 0.71168214 | 0.07478648 | 4.36285965 |
| GOTERM_BP_DIRECT | GO:0070374~positive regulation of ERK1 and ERK2                             | 4 | 0.05871129 | 0.00438158 | ICAM1, CCL2, NRP1, CCL5                  | 37 | 105 | 11368 | 11.7045045 | 0.81720654 | 0.09513056 | 5.91337706 |
| GOTERM_BP_DIRECT | GO:0070098~chemokine-mediated signaling pathway                             | 3 | 0.04403347 | 0.00605713 | CCL2, PPBP, CCL5                         | 37 | 37  | 11368 | 24.9116143 | 0.90474895 | 0.12245268 | 8.08763764 |

|                  |                                                                     |   |            |            |                        |    |     |       |            |            |            |            |
|------------------|---------------------------------------------------------------------|---|------------|------------|------------------------|----|-----|-------|------------|------------|------------|------------|
| GOTERM_BP_DIRECT | GO:0042102~positive regulation of T cell proliferation              | 3 | 0.04403347 | 0.00605713 | IL6ST, IFNG, CCL5      | 37 | 37  | 11368 | 24.9116143 | 0.90474895 | 0.12245268 | 8.08763764 |
| GOTERM_BP_DIRECT | GO:0001938~positive regulation of endothelial cell proliferation    | 3 | 0.04403347 | 0.00605713 | VEGFB, PGF, VEGFA      | 37 | 37  | 11368 | 24.9116143 | 0.90474895 | 0.12245268 | 8.08763764 |
| GOTERM_BP_DIRECT | GO:0042127~regulation of cell proliferation                         | 4 | 0.05871129 | 0.00620937 | PPBP, JAG2, JAK2, JAG1 | 37 | 119 | 11368 | 10.327504  | 0.91023126 | 0.11915129 | 8.28285751 |
| GOTERM_BP_DIRECT | GO:0003184~pulmonary valve morphogenesis                            | 2 | 0.02935564 | 0.01260875 | NOTCH2, JAG1           | 37 | 4   | 11368 | 153.621622 | 0.992632   | 0.21771054 | 16.1494849 |
| GOTERM_BP_DIRECT | GO:0010033~response to organic substance                            | 2 | 0.02935564 | 0.01260875 | TIMP4, TIMP3           | 37 | 4   | 11368 | 153.621622 | 0.992632   | 0.21771054 | 16.1494849 |
| GOTERM_BP_DIRECT | GO:0001666~response to hypoxia                                      | 3 | 0.04403347 | 0.01303292 | VEGFB, PGF, VEGFA      | 37 | 55  | 11368 | 16.7587224 | 0.99376075 | 0.21475294 | 16.6481111 |
| GOTERM_BP_DIRECT | GO:0043547~positive regulation of GTPase activity                   | 3 | 0.04403347 | 0.01303292 | F11R, CCL2, CCL5       | 37 | 55  | 11368 | 16.7587224 | 0.99376075 | 0.21475294 | 16.6481111 |
| GOTERM_BP_DIRECT | GO:0007219~Notch signaling pathway                                  | 3 | 0.04403347 | 0.01489817 | NOTCH2, JAG2, TIMP4    | 37 | 59  | 11368 | 15.6225378 | 0.99699949 | 0.23206041 | 18.8083039 |
| GOTERM_BP_DIRECT | GO:0048304~positive regulation of isotype switching to IgG isotypes | 2 | 0.02935564 | 0.0157367  | IL4, IFNG              | 37 | 5   | 11368 | 122.897297 | 0.99784191 | 0.23424476 | 19.7623953 |
| GOTERM_BP_DIRECT | GO:0045766~positive regulation of angiogenesis                      | 3 | 0.04403347 | 0.01842088 | VEGFB, PGF, VEGFA      | 37 | 66  | 11368 | 13.965602  | 0.99924994 | 0.25903851 | 22.7469937 |
| GOTERM_BP_DIRECT | GO:0045080~positive regulation of chemokine biosynthetic process    | 2 | 0.02935564 | 0.01885502 | IL4, IFNG              | 37 | 6   | 11368 | 102.414414 | 0.99936796 | 0.2552171  | 23.2199325 |
| GOTERM_BP_DIRECT | GO:0048246~macrophage chemotaxis                                    | 2 | 0.02935564 | 0.01885502 | CCL2, LGALS3           | 37 | 6   | 11368 | 102.414414 | 0.99936796 | 0.2552171  | 23.2199325 |
| GOTERM_BP_DIRECT | GO:0048245~eosinophil chemotaxis                                    | 2 | 0.02935564 | 0.01885502 | LGALS3, CCL5           | 37 | 6   | 11368 | 102.414414 | 0.99936796 | 0.2552171  | 23.2199325 |
| GOTERM_BP_DIRECT | GO:0010759~positive regulation of macrophage chemotaxis             | 2 | 0.02935564 | 0.02196374 | CCL2, CCL5             | 37 | 7   | 11368 | 87.7837838 | 0.99981492 | 0.28148268 | 26.5287655 |
| GOTERM_BP_DIRECT | GO:0050918~positive regulation of chemotaxis                        | 2 | 0.02935564 | 0.02506288 | NRP1, VEGFA            | 37 | 8   | 11368 | 76.8108108 | 0.99994581 | 0.30497881 | 29.6952775 |

|                  |                                                                             |   |            |            |                   |    |     |       |            |            |            |            |
|------------------|-----------------------------------------------------------------------------|---|------------|------------|-------------------|----|-----|-------|------------|------------|------------|------------|
| GOTERM_BP_DIRECT | GO:0045582~positive regulation of T cell differentiation                    | 2 | 0.02935564 | 0.02506288 | IL4, IL7          | 37 | 8   | 11368 | 76.8108108 | 0.99994581 | 0.30497881 | 29.6952775 |
| GOTERM_BP_DIRECT | GO:0035729~cellular response to hepatocyte growth factor stimulus           | 2 | 0.02935564 | 0.02815247 | NRP1, IL10        | 37 | 9   | 11368 | 68.2762763 | 0.99998413 | 0.32611074 | 32.7255784 |
| GOTERM_BP_DIRECT | GO:0044130~negative regulation of growth of symbiont in host                | 2 | 0.02935564 | 0.02815247 | IFNG, IL10        | 37 | 9   | 11368 | 68.2762763 | 0.99998413 | 0.32611074 | 32.7255784 |
| GOTERM_BP_DIRECT | GO:0090280~positive regulation of calcium ion import                        | 2 | 0.02935564 | 0.02815247 | CCL2, LGALS3      | 37 | 9   | 11368 | 68.2762763 | 0.99998413 | 0.32611074 | 32.7255784 |
| GOTERM_BP_DIRECT | GO:0042511~positive regulation of tyrosine phosphorylation of Stat1 protein | 2 | 0.02935564 | 0.03123254 | IL6ST, IFNG       | 37 | 10  | 11368 | 61.4486486 | 0.99999536 | 0.34520975 | 35.6255161 |
| GOTERM_BP_DIRECT | GO:0045672~positive regulation of osteoclast differentiation                | 2 | 0.02935564 | 0.03123254 | IFNG, IL20        | 37 | 10  | 11368 | 61.4486486 | 0.99999536 | 0.34520975 | 35.6255161 |
| GOTERM_BP_DIRECT | GO:0044344~cellular response to fibroblast growth factor stimulus           | 2 | 0.02935564 | 0.03123254 | CCL2, CCL5        | 37 | 10  | 11368 | 61.4486486 | 0.99999536 | 0.34520975 | 35.6255161 |
| GOTERM_BP_DIRECT | GO:0002042~cell migration involved in sprouting angiogenesis                | 2 | 0.02935564 | 0.03430311 | NRP1, VEGFA       | 37 | 11  | 11368 | 55.8624079 | 0.99999864 | 0.36254913 | 38.4006883 |
| GOTERM_BP_DIRECT | GO:0019221~cytokine-mediated signaling pathway                              | 3 | 0.04403347 | 0.04417977 | CCL2, IL1RN, JAK2 | 37 | 106 | 11368 | 8.69556349 | 0.99999997 | 0.4311219  | 46.5924538 |
| GOTERM_BP_DIRECT | GO:0009725~response to hormone                                              | 2 | 0.02935564 | 0.04649108 | TIMP2, TIMP1      | 37 | 15  | 11368 | 40.9657658 | 0.99999999 | 0.437712   | 48.3574858 |
| GOTERM_BP_DIRECT | GO:0090026~positive regulation of monocyte                                  | 2 | 0.02935564 | 0.04649108 | CCL2, CCL5        | 37 | 15  | 11368 | 40.9657658 | 0.99999999 | 0.437712   | 48.3574858 |
| GOTERM_BP_DIRECT | GO:0050796~regulation of insulin secretion                                  | 2 | 0.02935564 | 0.04951463 | IFNG, CCL5        | 37 | 16  | 11368 | 38.4054054 | 1          | 0.44873536 | 50.5847457 |

|                  |                                                                                              |   |            |            |                     |    |     |       |            |   |            |            |
|------------------|----------------------------------------------------------------------------------------------|---|------------|------------|---------------------|----|-----|-------|------------|---|------------|------------|
| GOTERM_BP_DIRECT | GO:2000352~negative regulation of endothelial cell apoptotic process                         | 2 | 0.02935564 | 0.05252885 | IL4, ICAM1          | 37 | 17  | 11368 | 36.1462639 | 1 | 0.45891453 | 52.7161312 |
| GOTERM_BP_DIRECT | GO:0031663~lipopolysaccharide-mediated signaling pathway                                     | 2 | 0.02935564 | 0.05553378 | CCL2, CCL5          | 37 | 18  | 11368 | 34.1381381 | 1 | 0.46834146 | 54.7557616 |
| GOTERM_BP_DIRECT | GO:0030154~cell differentiation                                                              | 3 | 0.04403347 | 0.05597185 | NOTCH2, VEGFA, JAG2 | 37 | 121 | 11368 | 7.61760107 | 1 | 0.46162095 | 55.0461924 |
| GOTERM_BP_DIRECT | GO:0048247~lymphocyte chemotaxis                                                             | 2 | 0.02935564 | 0.05852945 | CCL2, CCL5          | 37 | 19  | 11368 | 32.341394  | 1 | 0.46785171 | 56.7075792 |
| GOTERM_BP_DIRECT | GO:2001240~negative regulation of extrinsic apoptotic signaling pathway in absence of ligand | 2 | 0.02935564 | 0.05852945 | GFRAL, IL7          | 37 | 19  | 11368 | 32.341394  | 1 | 0.46785171 | 56.7075792 |
| GOTERM_BP_DIRECT | GO:0034097~response to cytokine                                                              | 2 | 0.02935564 | 0.06449309 | TIMP2, TIMP1        | 37 | 21  | 11368 | 29.2612613 | 1 | 0.49284983 | 60.3627078 |
| GOTERM_BP_DIRECT | GO:0030890~positive regulation of B cell proliferation                                       | 2 | 0.02935564 | 0.06746112 | IL4, IL7            | 37 | 22  | 11368 | 27.9312039 | 1 | 0.49996223 | 62.073087  |
| GOTERM_BP_DIRECT | GO:0045747~positive regulation of Notch signaling                                            | 2 | 0.02935564 | 0.06746112 | JAG2, JAG1          | 37 | 22  | 11368 | 27.9312039 | 1 | 0.49996223 | 62.073087  |
| GOTERM_BP_DIRECT | GO:0043491~protein kinase B signaling                                                        | 2 | 0.02935564 | 0.07336974 | CCL2, CCL5          | 37 | 24  | 11368 | 25.6036036 | 1 | 0.52156804 | 65.2760232 |
| GOTERM_BP_DIRECT | GO:0097191~extrinsic apoptotic signaling pathway                                             | 2 | 0.02935564 | 0.07336974 | TNFRSF12A, IFNG     | 37 | 24  | 11368 | 25.6036036 | 1 | 0.52156804 | 65.2760232 |
| GOTERM_BP_DIRECT | GO:0071407~cellular response to organic cyclic                                               | 2 | 0.02935564 | 0.07336974 | CCL2, CCL5          | 37 | 24  | 11368 | 25.6036036 | 1 | 0.52156804 | 65.2760232 |
| GOTERM_BP_DIRECT | GO:0051781~positive regulation of cell division                                              | 2 | 0.02935564 | 0.07336974 | PPBP, VEGFA         | 37 | 24  | 11368 | 25.6036036 | 1 | 0.52156804 | 65.2760232 |
| GOTERM_BP_DIRECT | GO:0071346~cellular response to interferon-gamma                                             | 2 | 0.02935564 | 0.08507799 | CCL2, CCL5          | 37 | 28  | 11368 | 21.9459459 | 1 | 0.5679805  | 70.8946332 |
| GOTERM_BP_DIRECT | GO:0071347~cellular response to interleukin-1                                                | 2 | 0.02935564 | 0.09376466 | CCL2, CCL5          | 37 | 31  | 11368 | 19.8221447 | 1 | 0.59634876 | 74.5045302 |
| GOTERM_BP_DIRECT | GO:0000165~MAPK cascade                                                                      | 2 | 0.02935564 | 0.09376466 | CCL2, CCL5          | 37 | 31  | 11368 | 19.8221447 | 1 | 0.59634876 | 74.5045302 |



|                  |                                                                           |   |            |            |                                                            |    |     |       |            |            |            |            |
|------------------|---------------------------------------------------------------------------|---|------------|------------|------------------------------------------------------------|----|-----|-------|------------|------------|------------|------------|
| GOTERM_BP_DIRECT | GO:0050731~positive regulation of peptidyl-tyrosine phosphorylation       | 2 | 0.02935564 | 0.09376466 | NRP1, VEGFA                                                | 37 | 31  | 11368 | 19.8221447 | 1          | 0.59634876 | 74.5045302 |
| GOTERM_BP_DIRECT | GO:0009887~organ morphogenesis                                            | 2 | 0.02935564 | 0.09664236 | NRP1, IL7                                                  | 37 | 32  | 11368 | 19.2027027 | 1          | 0.59937552 | 75.6056297 |
| GOTERM_BP_DIRECT | GO:0045669~positive regulation of osteoblast differentiation              | 2 | 0.02935564 | 0.09951118 | IL6ST, JAG1                                                | 37 | 33  | 11368 | 18.6208026 | 1          | 0.6022445  | 76.6592659 |
| <b>Day 14</b>    |                                                                           |   |            |            |                                                            |    |     |       |            |            |            |            |
| GOTERM_BP_DIRECT | GO:0030593~neutrophil chemotaxis                                          | 9 | 0.20896215 | 1.1284E-13 | CXCL1, CCL1, CCL12, CCL2, LGALS3, CXCL2, TREM1, CCL5, CCL7 | 34 | 58  | 17535 | 80.0278905 | 6.8582E-11 | 6.8582E-11 | 1.669E-10  |
| GOTERM_BP_DIRECT | GO:0070098~chemokine-mediated signaling pathway                           | 7 | 0.16252612 | 9.3138E-10 | CXCL1, CCL1, CCL12, CCL2, CXCL2, CCL5, CCL7                | 34 | 57  | 17535 | 63.3359133 | 5.6628E-07 | 2.8314E-07 | 1.3781E-06 |
| GOTERM_BP_DIRECT | GO:0002548~monocyte chemotaxis                                            | 6 | 0.1393081  | 3.3393E-09 | CCL1, CCL12, CCL2, LGALS3, CCL5, CCL7                      | 34 | 32  | 17535 | 96.7003676 | 2.0303E-06 | 6.7676E-07 | 4.9408E-06 |
| GOTERM_BP_DIRECT | GO:0071347~cellular response to interleukin-1                             | 7 | 0.16252612 | 2.559E-08  | CCL1, ICAM1, CCL12, CCL2, CXCL2, CCL5, CCL7                | 34 | 98  | 17535 | 36.8382353 | 1.5559E-05 | 3.8897E-06 | 3.7863E-05 |
| GOTERM_BP_DIRECT | GO:0048247~lymphocyte chemotaxis                                          | 5 | 0.11609009 | 7.4222E-08 | CCL1, CCL12, CCL2, CCL5, CCL7                              | 34 | 22  | 17535 | 117.212567 | 4.5126E-05 | 9.0254E-06 | 0.00010982 |
| GOTERM_BP_DIRECT | GO:0071346~cellular response to interferon-gamma                          | 6 | 0.1393081  | 9.4911E-08 | CCL1, ICAM1, CCL12, CCL2, CCL5, CCL7                       | 34 | 61  | 17535 | 50.7280617 | 5.7704E-05 | 9.6176E-06 | 0.00014043 |
| GOTERM_BP_DIRECT | GO:0051045~negative regulation of membrane protein ectodomain proteolysis | 4 | 0.09287207 | 2.1146E-07 | TIMP4, TIMP2, TIMP3, TIMP1                                 | 34 | 7   | 17535 | 294.705882 | 0.00012856 | 1.8366E-05 | 0.00031287 |
| GOTERM_BP_DIRECT | GO:0048245~eosinophil chemotaxis                                          | 4 | 0.09287207 | 7.222E-07  | CCL12, LGALS3, CCL5, CCL7                                  | 34 | 10  | 17535 | 206.294118 | 0.000439   | 5.4886E-05 | 0.00106857 |
| GOTERM_BP_DIRECT | GO:0006954~inflammatory response                                          | 8 | 0.18574414 | 1.0912E-06 | CXCL1, CCL1, CCL12, CCL2, CXCL2, CCL5, IL22, CCL7          | 34 | 297 | 17535 | 13.8918598 | 0.00066323 | 7.3714E-05 | 0.00161453 |
| GOTERM_BP_DIRECT | GO:0070374~positive regulation of ERK1 and ERK2                           | 7 | 0.16252612 | 1.1469E-06 | CCL1, ICAM1, CCL12, CCL2, VEGFA, CCL5, CCL7                | 34 | 186 | 17535 | 19.4093928 | 0.00069708 | 6.973E-05  | 0.00169697 |
| GOTERM_BP_DIRECT | GO:0051384~response to                                                    | 6 | 0.1393081  | 4.6582E-06 | CXCL1, CCL1, CCL2, CXCL2, CCL5, IL22                       | 34 | 133 | 17535 | 23.2662539 | 0.00282821 | 0.00025744 | 0.00689213 |
| GOTERM_BP_DIRECT | GO:0071356~cellular response to tumor necrosis factor                     | 6 | 0.1393081  | 4.6582E-06 | CCL1, ICAM1, CCL12, CCL2, CCL5, CCL7                       | 34 | 133 | 17535 | 23.2662539 | 0.00282821 | 0.00025744 | 0.00689213 |
| GOTERM_BP_DIRECT | GO:0007568~aging                                                          | 7 | 0.16252612 | 2.3577E-05 | CCL2, VEGFA, GFRA1, CCL5, TIMP2, TIMP3, TIMP1              | 34 | 315 | 17535 | 11.4607843 | 0.01423284 | 0.00119388 | 0.03487915 |

|                  |                                                                             |   |            |            |                                                  |    |     |       |            |            |            |            |
|------------------|-----------------------------------------------------------------------------|---|------------|------------|--------------------------------------------------|----|-----|-------|------------|------------|------------|------------|
| GOTERM_BP_DIRECT | GO:0042246~tissue regeneration                                              | 4 | 0.09287207 | 3.8147E-05 | NOTCH3, NOTCH2, NOTCH1, TIMP3                    | 34 | 35  | 17535 | 58.9411765 | 0.02292671 | 0.00178253 | 0.056427   |
| GOTERM_BP_DIRECT | GO:0016337~single organismal cell-cell adhesion                             | 5 | 0.11609009 | 4.3457E-05 | ICAM1, ICAM4, ICAM5, ICAM2, TCAM1                | 34 | 105 | 17535 | 24.5588235 | 0.0260764  | 0.00188554 | 0.06427974 |
| GOTERM_BP_DIRECT | GO:0043547~positive regulation of GTPase activity                           | 7 | 0.16252612 | 8.676E-05  | CCL1, ICAM1, CCL12, F11R, CCL2, CCL5, CCL7       | 34 | 398 | 17535 | 9.07072125 | 0.051385   | 0.00351064 | 0.12829313 |
| GOTERM_BP_DIRECT | GO:0010332~response to gamma radiation                                      | 4 | 0.09287207 | 8.7235E-05 | CXCL1, CCL2, CXCL2, CCL7                         | 34 | 46  | 17535 | 44.8465473 | 0.05165931 | 0.0033096  | 0.12899605 |
| GOTERM_BP_DIRECT | GO:0008360~regulation of cell shape                                         | 5 | 0.11609009 | 8.85E-05   | ICAM1, CCL12, CCL2, VEGFA, CCL7                  | 34 | 126 | 17535 | 20.4656863 | 0.05238803 | 0.0031603  | 0.13086433 |
| GOTERM_BP_DIRECT | GO:0007155~cell adhesion                                                    | 6 | 0.1393081  | 0.00011865 | ICAM1, F11R, ICAM4, ICAM5, ICAM2, TCAM1          | 34 | 261 | 17535 | 11.8559838 | 0.06960538 | 0.00400011 | 0.17541833 |
| GOTERM_BP_DIRECT | GO:0032496~response to lipopolysaccharide                                   | 6 | 0.1393081  | 0.00016482 | CXCL1, ICAM1, NOTCH1, CCL2, TIMP4, CCL5          | 34 | 280 | 17535 | 11.0514706 | 0.0953583  | 0.00526066 | 0.24358478 |
| GOTERM_BP_DIRECT | GO:0050729~positive regulation of inflammatory response                     | 4 | 0.09287207 | 0.00022329 | CCL1, CCL12, CCL2, CCL7                          | 34 | 63  | 17535 | 32.745098  | 0.12696177 | 0.0067658  | 0.32987291 |
| GOTERM_BP_DIRECT | GO:0043086~negative regulation of catalytic activity                        | 4 | 0.09287207 | 0.00028    | NOTCH1, TIMP4, TIMP3, TIMP1                      | 34 | 68  | 17535 | 30.3373702 | 0.15655669 | 0.00807496 | 0.41348615 |
| GOTERM_BP_DIRECT | GO:0008284~positive regulation of cell proliferation                        | 7 | 0.16252612 | 0.00030981 | NOTCH2, NOTCH1, CNTF, LGALS3, VEGFA, GAS1, TIMP1 | 34 | 503 | 17535 | 7.17723073 | 0.1717091  | 0.00852666 | 0.45741019 |
| GOTERM_BP_DIRECT | GO:0042493~response to drug                                                 | 7 | 0.16252612 | 0.00040143 | ICAM1, CCL2, HAVCR1, LGALS1, TIMP4, CCL5, TIMP2  | 34 | 528 | 17535 | 6.83739973 | 0.21660678 | 0.01055781 | 0.5923195  |
| GOTERM_BP_DIRECT | GO:0050679~positive regulation of epithelial cell proliferation             | 4 | 0.09287207 | 0.00040401 | NOTCH1, VEGFA, GAS1, CCL5                        | 34 | 77  | 17535 | 26.7914439 | 0.21783159 | 0.01018466 | 0.59610464 |
| GOTERM_BP_DIRECT | GO:0030154~cell differentiation                                             | 6 | 0.1393081  | 0.00060137 | NOTCH3, NOTCH2, F11R, NOTCH1, LGALS3, VEGFA      | 34 | 371 | 17535 | 8.34073252 | 0.30631848 | 0.0145232  | 0.88610482 |
| GOTERM_BP_DIRECT | GO:0034097~response to cytokine                                             | 4 | 0.09287207 | 0.00084223 | TIMP4, CCL5, TIMP2, TIMP1                        | 34 | 99  | 17535 | 20.8377897 | 0.40087746 | 0.01951058 | 1.23894484 |
| GOTERM_BP_DIRECT | GO:0035924~cellular response to vascular endothelial growth factor stimulus | 3 | 0.06965405 | 0.00084772 | NOTCH1, VEGFA, GAS1                              | 34 | 23  | 17535 | 67.269821  | 0.4028771  | 0.01891629 | 1.24697958 |

|                  |                                                                            |   |            |            |                               |    |     |       |            |            |            |            |
|------------------|----------------------------------------------------------------------------|---|------------|------------|-------------------------------|----|-----|-------|------------|------------|------------|------------|
| GOTERM_BP_DIRECT | GO:0046427~positive regulation of JAK-STAT cascade                         | 3 | 0.06965405 | 0.0009237  | NOTCH1, CNTF, IL22            | 34 | 24  | 17535 | 64.4669118 | 0.42985683 | 0.01986671 | 1.35803054 |
| GOTERM_BP_DIRECT | GO:0007219~Notch signaling pathway                                         | 4 | 0.09287207 | 0.00094478 | NOTCH3, NOTCH2, NOTCH1, TIMP4 | 34 | 103 | 17535 | 20.0285551 | 0.43712649 | 0.01962218 | 1.3888304  |
| GOTERM_BP_DIRECT | GO:0050918~positive chemotaxis                                             | 3 | 0.06965405 | 0.00125912 | LGALS3, VEGFA, CCL5           | 34 | 28  | 17535 | 55.2573529 | 0.53514526 | 0.0252111  | 1.84690856 |
| GOTERM_BP_DIRECT | GO:0042060~wound healing                                                   | 4 | 0.09287207 | 0.00168853 | NOTCH2, VEGFA, CXCL2, TIMP1   | 34 | 126 | 17535 | 16.372549  | 0.6420973  | 0.0326017  | 2.46946074 |
| GOTERM_BP_DIRECT | GO:0010951~negative regulation of endopeptidase activity                   | 4 | 0.09287207 | 0.00267017 | TIMP4, TIMP2, TIMP3, TIMP1    | 34 | 148 | 17535 | 13.9387917 | 0.80321315 | 0.04953227 | 3.87883926 |
| GOTERM_BP_DIRECT | GO:0071310~cellular response to organic substance                          | 3 | 0.06965405 | 0.00269001 | ICAM1, TIMP2, TIMP3           | 34 | 41  | 17535 | 37.7367288 | 0.80557959 | 0.04841689 | 3.90713501 |
| GOTERM_BP_DIRECT | GO:0044344~cellular response to fibroblast growth factor stimulus          | 3 | 0.06965405 | 0.0028212  | CCL2, VEGFA, CCL5             | 34 | 42  | 17535 | 36.8382353 | 0.82052392 | 0.04926602 | 4.09398639 |
| GOTERM_BP_DIRECT | GO:0001975~response to amphetamine                                         | 3 | 0.06965405 | 0.00337545 | CXCL1, ICAM1, CXCL2           | 34 | 46  | 17535 | 33.6349105 | 0.87200223 | 0.05704385 | 4.87968506 |
| GOTERM_BP_DIRECT | GO:0071222~cellular response to lipopolysaccharide                         | 4 | 0.09287207 | 0.00375309 | ICAM1, CCL2, CXCL2, CCL5      | 34 | 167 | 17535 | 12.3529412 | 0.8983452  | 0.06153038 | 5.41159302 |
| GOTERM_BP_DIRECT | GO:0071403~cellular response to high density lipoprotein particle stimulus | 2 | 0.04643603 | 0.00376047 | CCL2, CCL5                    | 34 | 2   | 17535 | 515.735294 | 0.89880168 | 0.0600326  | 5.42195221 |
| GOTERM_BP_DIRECT | GO:1901215~negative regulation of neuron death                             | 3 | 0.06965405 | 0.00496382 | CNTF, VEGFA, CCL5             | 34 | 56  | 17535 | 27.6286765 | 0.95146721 | 0.07653173 | 7.09823936 |
| GOTERM_BP_DIRECT | GO:0045785~positive regulation of cell adhesion                            | 3 | 0.06965405 | 0.00513829 | CCL2, VEGFA, CCL5             | 34 | 57  | 17535 | 27.1439628 | 0.9563754  | 0.07717082 | 7.33897149 |
| GOTERM_BP_DIRECT | GO:0043200~response to amino acid                                          | 3 | 0.06965405 | 0.00531556 | ICAM1, CCL2, TIMP3            | 34 | 58  | 17535 | 26.6759635 | 0.96085502 | 0.07781745 | 7.58297199 |
| GOTERM_BP_DIRECT | GO:0071549~cellular response to dexamethasone stimulus                     | 3 | 0.06965405 | 0.00549563 | ICAM1, CCL2, VEGFA            | 34 | 59  | 17535 | 26.2238285 | 0.96493519 | 0.07847089 | 7.83019939 |
| GOTERM_BP_DIRECT | GO:0072104~glomerular capillary formation                                  | 2 | 0.04643603 | 0.00563555 | NOTCH3, NOTCH2                | 34 | 3   | 17535 | 343.823529 | 0.96781027 | 0.07855491 | 8.02188995 |

|                  |                                                                                                        |   |            |            |                           |    |     |       |            |            |            |            |
|------------------|--------------------------------------------------------------------------------------------------------|---|------------|------------|---------------------------|----|-----|-------|------------|------------|------------|------------|
| GOTERM_BP_DIRECT | GO:0007399~nervous system development                                                                  | 4 | 0.09287207 | 0.00611446 | CNTF, VEGFA, GFRA1, GFRA2 | 34 | 199 | 17535 | 10.3665386 | 0.97598327 | 0.08306715 | 8.67516104 |
| GOTERM_BP_DIRECT | GO:0030335~positive regulation of cell migration                                                       | 4 | 0.09287207 | 0.00663646 | NOTCH1, VEGFA, CCL5, CCL7 | 34 | 205 | 17535 | 10.0631277 | 0.98255005 | 0.08790353 | 9.38228804 |
| GOTERM_BP_DIRECT | GO:0045185~enhancement of protein location                                                             | 2 | 0.04643603 | 0.00750722 | LGALS3, LGALS1            | 34 | 4   | 17535 | 257.867647 | 0.98976158 | 0.09680202 | 10.5504981 |
| GOTERM_BP_DIRECT | GO:0035860~glial cell-derived neurotrophic factor receptor signaling pathway                           | 2 | 0.04643603 | 0.00750722 | GFRA4, GFRA2              | 34 | 4   | 17535 | 257.867647 | 0.98976158 | 0.09680202 | 10.5504981 |
| GOTERM_BP_DIRECT | GO:0046533~negative regulation of photoreceptor cell differentiation                                   | 2 | 0.04643603 | 0.00750722 | NOTCH1, CNTF              | 34 | 4   | 17535 | 257.867647 | 0.98976158 | 0.09680202 | 10.5504981 |
| GOTERM_BP_DIRECT | GO:0061419~positive regulation of transcription from RNA polymerase II promoter in response to hypoxia | 2 | 0.04643603 | 0.00937547 | NOTCH1, VEGFA             | 34 | 5   | 17535 | 206.294118 | 0.99674373 | 0.11706506 | 13.0097297 |
| GOTERM_BP_DIRECT | GO:0030855~epithelial cell                                                                             | 3 | 0.06965405 | 0.0094332  | F11R, LGALS3, VEGFA       | 34 | 78  | 17535 | 19.8359729 | 0.9968571  | 0.11539028 | 13.0847154 |
| GOTERM_BP_DIRECT | GO:0009408~response to heat                                                                            | 3 | 0.06965405 | 0.0094332  | CXCL1, CCL2, CXCL2        | 34 | 78  | 17535 | 19.8359729 | 0.9968571  | 0.11539028 | 13.0847154 |
| GOTERM_BP_DIRECT | GO:0048661~positive regulation of smooth muscle cell proliferation                                     | 3 | 0.06965405 | 0.01062738 | NOTCH3, VEGFA, CCL5       | 34 | 83  | 17535 | 18.6410347 | 0.99849057 | 0.12657573 | 14.6222221 |
| GOTERM_BP_DIRECT | GO:2000503~positive regulation of natural killer cell                                                  | 2 | 0.04643603 | 0.0112403  | CCL5, CCL7                | 34 | 6   | 17535 | 171.911765 | 0.99896443 | 0.13086891 | 15.4014844 |
| GOTERM_BP_DIRECT | GO:0072602~interleukin-4 secretion                                                                     | 2 | 0.04643603 | 0.0112403  | NOTCH2, NOTCH1            | 34 | 6   | 17535 | 171.911765 | 0.99896443 | 0.13086891 | 15.4014844 |
| GOTERM_BP_DIRECT | GO:0002693~positive regulation of cellular                                                             | 2 | 0.04643603 | 0.0112403  | ICAM1, CCL2               | 34 | 6   | 17535 | 171.911765 | 0.99896443 | 0.13086891 | 15.4014844 |
| GOTERM_BP_DIRECT | GO:0071333~cellular response to glucose stimulus                                                       | 3 | 0.06965405 | 0.01214398 | ICAM1, CCL2, LGALS1       | 34 | 89  | 17535 | 17.3843358 | 0.99940606 | 0.13806446 | 16.5383096 |

|                  |                                                                  |   |            |            |                     |    |     |       |            |            |            |            |
|------------------|------------------------------------------------------------------|---|------------|------------|---------------------|----|-----|-------|------------|------------|------------|------------|
| GOTERM_BP_DIRECT | GO:2001200~positive regulation of dendritic cell differentiation | 2 | 0.04643603 | 0.01310174 | LGALS3, LGALS1      | 34 | 7   | 17535 | 147.352941 | 0.99967069 | 0.14548865 | 17.72761   |
| GOTERM_BP_DIRECT | GO:0060754~positive regulation of mast cell                      | 2 | 0.04643603 | 0.01310174 | VEGFA, CCL5         | 34 | 7   | 17535 | 147.352941 | 0.99967069 | 0.14548865 | 17.72761   |
| GOTERM_BP_DIRECT | GO:0006874~cellular calcium ion homeostasis                      | 3 | 0.06965405 | 0.01430453 | CCL12, CCL2, CCL5   | 34 | 97  | 17535 | 15.9505761 | 0.99984311 | 0.15503553 | 19.198799  |
| GOTERM_BP_DIRECT | GO:0009725~response to hormone                                   | 3 | 0.06965405 | 0.01486887 | TIMP4, TIMP2, TIMP3 | 34 | 99  | 17535 | 15.6283422 | 0.99988924 | 0.15789619 | 19.8805834 |
| GOTERM_BP_DIRECT | GO:0035148~tube formation                                        | 2 | 0.04643603 | 0.01495977 | NOTCH1, VEGFA       | 34 | 8   | 17535 | 128.933824 | 0.99989528 | 0.15608927 | 19.9899037 |
| GOTERM_BP_DIRECT | GO:0007417~central nervous system development                    | 3 | 0.06965405 | 0.01544274 | TIMP4, TIMP2, TIMP3 | 34 | 101 | 17535 | 15.3188701 | 0.99992228 | 0.15805815 | 20.5683778 |
| GOTERM_BP_DIRECT | GO:0045766~positive regulation of angiogenesis                   | 3 | 0.06965405 | 0.02036787 | LGALS3, VEGFA, CCL5 | 34 | 117 | 17535 | 13.2239819 | 0.99999632 | 0.20022112 | 26.2489317 |
| GOTERM_BP_DIRECT | GO:0003184~pulmonary valve morphogenesis                         | 2 | 0.04643603 | 0.02051355 | NOTCH2, NOTCH1      | 34 | 11  | 17535 | 93.7700535 | 0.99999663 | 0.1983528  | 26.4110371 |
| GOTERM_BP_DIRECT | GO:0071407~cellular response to organic cyclic                   | 3 | 0.06965405 | 0.02202513 | CCL2, LGALS1, CCL5  | 34 | 122 | 17535 | 12.6820154 | 0.99999868 | 0.20821442 | 28.0735751 |
| GOTERM_BP_DIRECT | GO:0048246~macrophage chemotaxis                                 | 2 | 0.04643603 | 0.02235805 | CCL2, LGALS3        | 34 | 12  | 17535 | 85.9558824 | 0.99999893 | 0.20785936 | 28.4350132 |
| GOTERM_BP_DIRECT | GO:0007010~cytoskeleton organization                             | 3 | 0.06965405 | 0.02408543 | CCL12, CCL2, CCL7   | 34 | 128 | 17535 | 12.087546  | 0.99999963 | 0.21890069 | 30.2832938 |
| GOTERM_BP_DIRECT | GO:0070986~left/right axis                                       | 2 | 0.04643603 | 0.02419918 | NOTCH2, NOTCH1      | 34 | 13  | 17535 | 79.3438914 | 0.99999966 | 0.21664147 | 30.4034332 |
| GOTERM_BP_DIRECT | GO:0010812~negative regulation of cell-substrate                 | 2 | 0.04643603 | 0.02419918 | NOTCH1, LGALS1      | 34 | 13  | 17535 | 79.3438914 | 0.99999966 | 0.21664147 | 30.4034332 |
| GOTERM_BP_DIRECT | GO:0002544~chronic inflammatory response                         | 2 | 0.04643603 | 0.02419918 | CCL2, CCL5          | 34 | 13  | 17535 | 79.3438914 | 0.99999966 | 0.21664147 | 30.4034332 |
| GOTERM_BP_DIRECT | GO:0010759~positive regulation of macrophage chemotaxis          | 2 | 0.04643603 | 0.02603696 | CCL2, CCL5          | 34 | 14  | 17535 | 73.6764706 | 0.99999989 | 0.22795544 | 32.3178189 |
| GOTERM_BP_DIRECT | GO:0090557~establishment of endothelial                          | 2 | 0.04643603 | 0.02603696 | ICAM1, F11R         | 34 | 14  | 17535 | 73.6764706 | 0.99999989 | 0.22795544 | 32.3178189 |

|                  |                                                                  |   |            |            |                   |    |     |       |            |   |            |            |
|------------------|------------------------------------------------------------------|---|------------|------------|-------------------|----|-----|-------|------------|---|------------|------------|
| GOTERM_BP_DIRECT | GO:0090026~positive regulation of monocyte                       | 2 | 0.04643603 | 0.03335454 | CCL2, CCL5        | 34 | 18  | 17535 | 57.3039216 | 1 | 0.27919638 | 39.4640251 |
| GOTERM_BP_DIRECT | GO:0090280~positive regulation of calcium ion import             | 2 | 0.04643603 | 0.03335454 | CCL2, LGALS3      | 34 | 18  | 17535 | 57.3039216 | 1 | 0.27919638 | 39.4640251 |
| GOTERM_BP_DIRECT | GO:0051593~response to folic acid                                | 2 | 0.04643603 | 0.03517558 | VEGFA, TIMP3      | 34 | 19  | 17535 | 54.2879257 | 1 | 0.28836269 | 41.1296512 |
| GOTERM_BP_DIRECT | GO:0043524~negative regulation of neuron apoptotic process       | 3 | 0.06965405 | 0.03549494 | CCL2, CNTF, GFRAL | 34 | 158 | 17535 | 9.79244229 | 1 | 0.28684031 | 41.4173135 |
| GOTERM_BP_DIRECT | GO:0002437~inflammatory response to antigenic                    | 2 | 0.04643603 | 0.03880771 | NOTCH2, NOTCH1    | 34 | 21  | 17535 | 49.1176471 | 1 | 0.30554162 | 44.3249433 |
| GOTERM_BP_DIRECT | GO:0048010~vascular endothelial growth factor receptor signaling | 2 | 0.04643603 | 0.03880771 | CCL2, VEGFA       | 34 | 21  | 17535 | 49.1176471 | 1 | 0.30554162 | 44.3249433 |
| GOTERM_BP_DIRECT | GO:0002687~positive regulation of leukocyte migration            | 2 | 0.04643603 | 0.04061879 | CCL12, CCL2       | 34 | 22  | 17535 | 46.8850267 | 1 | 0.31360054 | 45.8570819 |
| GOTERM_BP_DIRECT | GO:0030279~negative regulation of ossification                   | 2 | 0.04643603 | 0.04061879 | NOTCH1, GFRA4     | 34 | 22  | 17535 | 46.8850267 | 1 | 0.31360054 | 45.8570819 |
| GOTERM_BP_DIRECT | GO:0045672~positive regulation of osteoclast differentiation     | 2 | 0.04643603 | 0.04242657 | NOTCH2, CCL5      | 34 | 23  | 17535 | 44.8465473 | 1 | 0.32133364 | 47.3471411 |
| GOTERM_BP_DIRECT | GO:0048844~artery morphogenesis                                  | 2 | 0.04643603 | 0.04603221 | NOTCH3, VEGFA     | 34 | 25  | 17535 | 41.2588235 | 1 | 0.33982458 | 50.2056033 |
| GOTERM_BP_DIRECT | GO:0007159~leukocyte cell-cell                                   | 2 | 0.04643603 | 0.04603221 | ICAM1, CCL5       | 34 | 25  | 17535 | 41.2588235 | 1 | 0.33982458 | 50.2056033 |
| GOTERM_BP_DIRECT | GO:0090023~positive regulation of neutrophil                     | 2 | 0.04643603 | 0.04603221 | CXCL1, CXCL2      | 34 | 25  | 17535 | 41.2588235 | 1 | 0.33982458 | 50.2056033 |
| GOTERM_BP_DIRECT | GO:0071361~cellular response to                                  | 2 | 0.04643603 | 0.0478301  | CCL5, CCL7        | 34 | 26  | 17535 | 39.6719457 | 1 | 0.34668927 | 51.5762192 |
| GOTERM_BP_DIRECT | GO:0002052~positive regulation of neuroblast proliferation       | 2 | 0.04643603 | 0.0478301  | NOTCH1, VEGFA     | 34 | 26  | 17535 | 39.6719457 | 1 | 0.34668927 | 51.5762192 |
| GOTERM_BP_DIRECT | GO:0071354~cellular response to interleukin-6                    | 2 | 0.04643603 | 0.05141601 | ICAM1, CCL2       | 34 | 28  | 17535 | 36.8382353 | 1 | 0.36365701 | 54.2055281 |

|                  |                                                                                              |   |            |            |                     |    |     |       |            |   |            |            |
|------------------|----------------------------------------------------------------------------------------------|---|------------|------------|---------------------|----|-----|-------|------------|---|------------|------------|
| GOTERM_BP_DIRECT | GO:0045861~negative regulation of proteolysis                                                | 2 | 0.04643603 | 0.05141601 | TIMP2, TIMP3        | 34 | 28  | 17535 | 36.8382353 | 1 | 0.36365701 | 54.2055281 |
| GOTERM_BP_DIRECT | GO:0016477~cell migration                                                                    | 3 | 0.06965405 | 0.05281298 | VEGFA, GFRA1, TREM1 | 34 | 197 | 17535 | 7.85383697 | 1 | 0.36756936 | 55.1933116 |
| GOTERM_BP_DIRECT | GO:0040007~growth                                                                            | 2 | 0.04643603 | 0.05320406 | CNTF, VEGFA         | 34 | 29  | 17535 | 35.5679513 | 1 | 0.36577261 | 55.4662573 |
| GOTERM_BP_DIRECT | GO:0032355~response to estradiol                                                             | 3 | 0.06965405 | 0.05473185 | CXCL1, VEGFA, CXCL2 | 34 | 201 | 17535 | 7.6975417  | 1 | 0.37026942 | 56.5177734 |
| GOTERM_BP_DIRECT | GO:0031663~lipopolysaccharide-mediated signaling pathway                                     | 2 | 0.04643603 | 0.05677034 | CCL2, CCL5          | 34 | 31  | 17535 | 33.2732448 | 1 | 0.37736704 | 57.8847487 |
| GOTERM_BP_DIRECT | GO:0048663~neural fate commitment                                                            | 2 | 0.04643603 | 0.05677034 | NOTCH3, NOTCH1      | 34 | 31  | 17535 | 33.2732448 | 1 | 0.37736704 | 57.8847487 |
| GOTERM_BP_DIRECT | GO:0042517~positive regulation of tyrosine phosphorylation of Stat3 protein                  | 2 | 0.04643603 | 0.05677034 | CNTF, VEGFA         | 34 | 31  | 17535 | 33.2732448 | 1 | 0.37736704 | 57.8847487 |
| GOTERM_BP_DIRECT | GO:0045930~negative regulation of mitotic cell cycle                                         | 2 | 0.04643603 | 0.0585486  | GAS1, TIMP2         | 34 | 32  | 17535 | 32.2334559 | 1 | 0.38286063 | 59.0443845 |
| GOTERM_BP_DIRECT | GO:0006959~humoral immune                                                                    | 2 | 0.04643603 | 0.06209536 | NOTCH2, NOTCH1      | 34 | 34  | 17535 | 30.3373702 | 1 | 0.3972155  | 61.2689297 |
| GOTERM_BP_DIRECT | GO:0034612~response to tumor necrosis factor                                                 | 2 | 0.04643603 | 0.06386388 | CCL2, CCL5          | 34 | 35  | 17535 | 29.4705882 | 1 | 0.40215142 | 62.3355632 |
| GOTERM_BP_DIRECT | GO:0048754~branching morphogenesis of an epithelial tube                                     | 2 | 0.04643603 | 0.06562916 | NOTCH1, VEGFA       | 34 | 36  | 17535 | 28.6519608 | 1 | 0.40692398 | 63.3728806 |
| GOTERM_BP_DIRECT | GO:2001240~negative regulation of extrinsic apoptotic signaling pathway in absence of ligand | 2 | 0.04643603 | 0.06562916 | GFRAL, GAS1         | 34 | 36  | 17535 | 28.6519608 | 1 | 0.40692398 | 63.3728806 |
| GOTERM_BP_DIRECT | GO:0030513~positive regulation of BMP signaling                                              | 2 | 0.04643603 | 0.06562916 | NOTCH2, NOTCH1      | 34 | 36  | 17535 | 28.6519608 | 1 | 0.40692398 | 63.3728806 |
| GOTERM_BP_DIRECT | GO:0002053~positive regulation of mesenchymal cell proliferation                             | 2 | 0.04643603 | 0.06562916 | VEGFA, GAS1         | 34 | 36  | 17535 | 28.6519608 | 1 | 0.40692398 | 63.3728806 |
| GOTERM_BP_DIRECT | GO:0043491~protein kinase B signaling                                                        | 2 | 0.04643603 | 0.06739122 | CCL2, CCL5          | 34 | 37  | 17535 | 27.8775835 | 1 | 0.41154102 | 64.3816861 |

|                  |                                                     |   |            |            |                            |    |     |       |            |   |            |            |
|------------------|-----------------------------------------------------|---|------------|------------|----------------------------|----|-----|-------|------------|---|------------|------------|
| GOTERM_BP_DIRECT | GO:0042127~regulation of cell proliferation         | 3 | 0.06965405 | 0.07146402 | CXCL1, NOTCH1, CXCL2       | 34 | 234 | 17535 | 6.61199095 | 1 | 0.42681903 | 66.6151308 |
| GOTERM_BP_DIRECT | GO:0043066~negative regulation of apoptotic process | 4 | 0.09287207 | 0.07243989 | LGALS3, VEGFA, GAS1, TIMP1 | 34 | 517 | 17535 | 3.99021504 | 1 | 0.42739734 | 67.1305281 |
| GOTERM_BP_DIRECT | GO:0046677~response to antibiotic                   | 2 | 0.04643603 | 0.0848355  | CCL2, HAVCR1               | 34 | 47  | 17535 | 21.9461827 | 1 | 0.47764015 | 73.0635035 |
| GOTERM_BP_DIRECT | GO:0006955~immune response                          | 3 | 0.06965405 | 0.08963474 | CXCL1, CXCL2, IL22         | 34 | 267 | 17535 | 5.79477859 | 1 | 0.49324369 | 75.0796269 |
| GOTERM_BP_DIRECT | GO:0001666~response to hypoxia                      | 3 | 0.06965405 | 0.0913501  | ICAM1, CCL2, VEGFA         | 34 | 270 | 17535 | 5.73039216 | 1 | 0.49602011 | 75.7654333 |
| GOTERM_BP_DIRECT | GO:0014070~response to organic cyclic compound      | 3 | 0.06965405 | 0.09249916 | ICAM1, CCL5, TIMP3         | 34 | 272 | 17535 | 5.68825692 | 1 | 0.49651292 | 76.2149479 |
| GOTERM_BP_DIRECT | GO:0001701~in utero embryonic development           | 3 | 0.06965405 | 0.09713839 | NOTCH2, NOTCH1, VEGFA      | 34 | 280 | 17535 | 5.52573529 | 1 | 0.51038082 | 77.9519356 |

**Day 28**

|                  |                                                      |   |            |            |                                     |    |     |       |            |            |            |            |
|------------------|------------------------------------------------------|---|------------|------------|-------------------------------------|----|-----|-------|------------|------------|------------|------------|
| GOTERM_BP_DIRECT | GO:0051045~negative regulation of cell proliferation | 4 | 0.08766163 | 2.3337E-07 | TIMP4, TIMP2, TIMP3, TIMP1          | 30 | 6   | 12321 | 273.8      | 8.75E-05   | 8.75E-05   | 3.22E-04   |
| GOTERM_BP_DIRECT | GO:0043086~negative regulation of cell proliferation | 4 | 0.08766163 | 3.3005E-06 | TIMP4, TIMP2, TIMP3, TIMP1          | 30 | 13  | 12321 | 126.369231 | 1.24E-03   | 6.19E-04   | 4.56E-03   |
| GOTERM_BP_DIRECT | GO:0007219~Notch signaling                           | 5 | 0.10957703 | 1.5173E-05 | NOTCH3, NOTCH2, NOTCH1, JAG2, TIMP4 | 30 | 65  | 12321 | 31.5923077 | 5.67E-03   | 1.89E-03   | 2.10E-02   |
| GOTERM_BP_DIRECT | GO:0003184~pulmonary artery morphogenesis            | 3 | 0.06574622 | 3.2002E-05 | NOTCH2, NOTCH1, JAG1                | 30 | 4   | 12321 | 308.025    | 1.19E-02   | 3.00E-03   | 4.42E-02   |
| GOTERM_BP_DIRECT | GO:0043524~negative regulation of cell proliferation | 5 | 0.10957703 | 4.8134E-05 | HRAS, NRP1, CNTF, GFRAL, GDNF       | 30 | 87  | 12321 | 23.6034483 | 1.79E-02   | 3.60E-03   | 6.65E-02   |
| GOTERM_BP_DIRECT | GO:0035924~cellular morphogenesis                    | 3 | 0.06574622 | 0.00029037 | NOTCH1, VEGFA, GAS1                 | 30 | 11  | 12321 | 112.009091 | 1.03E-01   | 1.80E-02   | 4.00E-01   |
| GOTERM_BP_DIRECT | GO:0016337~single organ morphogenesis                | 4 | 0.08766163 | 0.00034882 | ICAM1, ICAM4, ICAM5, ICAM2          | 30 | 59  | 12321 | 27.8440678 | 1.23E-01   | 1.85E-02   | 4.81E-01   |
| GOTERM_BP_DIRECT | GO:0048010~vasculature morphogenesis                 | 3 | 0.06574622 | 0.00041059 | VEGFB, NRP1, VEGFA                  | 30 | 13  | 12321 | 94.7769231 | 1.43E-01   | 1.91E-02   | 5.66E-01   |
| GOTERM_BP_DIRECT | GO:0045747~positive regulation of cell proliferation | 3 | 0.06574622 | 0.00223376 | NOTCH1, JAG2, JAG1                  | 30 | 30  | 12321 | 41.07      | 5.68E-01   | 8.90E-02   | 3.04E+00   |
| GOTERM_BP_DIRECT | GO:0050679~positive regulation of cell proliferation | 3 | 0.06574622 | 0.0030332  | NOTCH1, HRAS, CCL5                  | 30 | 35  | 12321 | 35.2028571 | 6.80E-01   | 1.08E-01   | 4.11E+00   |
| GOTERM_BP_DIRECT | GO:0070374~positive regulation of cell proliferation | 4 | 0.08766163 | 0.00321314 | ICAM1, HRAS, NRP1, CCL5             | 30 | 127 | 12321 | 12.9354331 | 7.01E-01   | 1.04E-01   | 4.35E+00   |
| GOTERM_BP_DIRECT | GO:0007155~cell adhesion                             | 4 | 0.08766163 | 0.00431153 | ICAM1, ICAM4, ICAM5, ICAM2          | 30 | 141 | 12321 | 11.6510638 | 8.02E-01   | 1.26E-01   | 5.80E+00   |
| GOTERM_BP_DIRECT | GO:0050793~regulation of cell proliferation          | 2 | 0.04383081 | 0.00470206 | NOTCH2, NOTCH1                      | 30 | 2   | 12321 | 410.7      | 0.82922892 | 0.12711919 | 6.30465038 |
| GOTERM_BP_DIRECT | GO:0030593~neutrophil chemotaxis                     | 3 | 0.06574622 | 0.00564258 | LGALS3, TREM1, CCL5                 | 30 | 48  | 12321 | 25.66875   | 0.88020355 | 0.14064112 | 7.52061283 |
| GOTERM_BP_DIRECT | GO:0009912~auditory perception                       | 2 | 0.04383081 | 0.00704508 | NOTCH1, JAG2                        | 30 | 3   | 12321 | 273.8      | 0.92943738 | 0.16201101 | 9.30667376 |
| GOTERM_BP_DIRECT | GO:0072017~distal limb morphogenesis                 | 2 | 0.04383081 | 0.00704508 | NOTCH1, JAG1                        | 30 | 3   | 12321 | 273.8      | 0.92943738 | 0.16201101 | 9.30667376 |
| GOTERM_BP_DIRECT | GO:0046533~negative regulation of cell proliferation | 2 | 0.04383081 | 0.00938277 | NOTCH1, CNTF                        | 30 | 4   | 12321 | 205.35     | 0.97084562 | 0.19824073 | 12.2127439 |
| GOTERM_BP_DIRECT | GO:0060754~positive regulation of cell proliferation | 2 | 0.04383081 | 0.01171515 | VEGFB, VEGFA                        | 30 | 5   | 12321 | 164.28     | 0.98795514 | 0.22890837 | 15.0259203 |
| GOTERM_BP_DIRECT | GO:0060982~coronary artery morphogenesis             | 2 | 0.04383081 | 0.01171515 | NOTCH1, NRP1                        | 30 | 5   | 12321 | 164.28     | 0.98795514 | 0.22890837 | 15.0259203 |
| GOTERM_BP_DIRECT | GO:2000737~negative regulation of cell proliferation | 2 | 0.04383081 | 0.01404222 | NOTCH1, JAG1                        | 30 | 6   | 12321 | 136.9      | 0.99502413 | 0.25518527 | 17.7491651 |
| GOTERM_BP_DIRECT | GO:0010033~response to hypoxia                       | 2 | 0.04383081 | 0.01404222 | TIMP4, TIMP3                        | 30 | 6   | 12321 | 136.9      | 0.99502413 | 0.25518527 | 17.7491651 |
| GOTERM_BP_DIRECT | GO:0008284~positive regulation of cell proliferation | 4 | 0.08766163 | 0.01457755 | CNTF, VEGFA, GDNF, TIMP1            | 30 | 220 | 12321 | 7.46727273 | 0.995941   | 0.25161112 | 18.3640661 |
| GOTERM_BP_DIRECT | GO:0035767~endothelial cell proliferation            | 2 | 0.04383081 | 0.01636401 | NRP1, VEGFA                         | 30 | 7   | 12321 | 117.342857 | 0.99794456 | 0.26608594 | 20.3853463 |
| GOTERM_BP_DIRECT | GO:0035148~tube morphogenesis                        | 2 | 0.04383081 | 0.01868051 | NOTCH1, VEGFA                       | 30 | 8   | 12321 | 102.675    | 0.999151   | 0.28590244 | 22.9372407 |
| GOTERM_BP_DIRECT | GO:0010951~negative regulation of cell proliferation | 2 | 0.04383081 | 0.01868051 | TIMP2, TIMP1                        | 30 | 8   | 12321 | 102.675    | 0.999151   | 0.28590244 | 22.9372407 |



|                                       |            |            |                                 |    |     |       |            |            |            |            |
|---------------------------------------|------------|------------|---------------------------------|----|-----|-------|------------|------------|------------|------------|
| GOTERM_BP_DIRECT GO:0048245~eosino 2  | 0.04383081 | 0.01868051 | LGALS3, CCL5                    | 30 | 8   | 12321 | 102.675    | 0.999151   | 0.28590244 | 22.9372407 |
| GOTERM_BP_DIRECT GO:0032495~respon 2  | 0.04383081 | 0.02099175 | NOTCH1, JAG1                    | 30 | 9   | 12321 | 91.2666667 | 0.99964934 | 0.30345502 | 25.4075367 |
| GOTERM_BP_DIRECT GO:0097193~intrins 2 | 0.04383081 | 0.02559847 | HRAS, LGALS12                   | 30 | 11  | 12321 | 74.6727273 | 0.9999402  | 0.34479116 | 30.1136617 |
| GOTERM_BP_DIRECT GO:0048485~sympa 2   | 0.04383081 | 0.02559847 | GDNF, GFRA3                     | 30 | 11  | 12321 | 74.6727273 | 0.9999402  | 0.34479116 | 30.1136617 |
| GOTERM_BP_DIRECT GO:0002042~cell m 2  | 0.04383081 | 0.02559847 | NRP1, VEGFA                     | 30 | 11  | 12321 | 74.6727273 | 0.9999402  | 0.34479116 | 30.1136617 |
| GOTERM_BP_DIRECT GO:0050930~induct 2  | 0.04383081 | 0.02789397 | VEGFB, VEGFA                    | 30 | 12  | 12321 | 68.45      | 0.9999753  | 0.35727445 | 32.3544506 |
| GOTERM_BP_DIRECT GO:0050918~positiv 2 | 0.04383081 | 0.02789397 | NRP1, VEGFA                     | 30 | 12  | 12321 | 68.45      | 0.9999753  | 0.35727445 | 32.3544506 |
| GOTERM_BP_DIRECT GO:0009725~respon 2  | 0.04383081 | 0.03018425 | TIMP2, TIMP1                    | 30 | 13  | 12321 | 63.1846154 | 0.9999898  | 0.36855072 | 34.5235659 |
| GOTERM_BP_DIRECT GO:0045944~positiv 5 | 0.10957703 | 0.03207347 | NOTCH3, HRAS, VEGFA, JAG1, GDNF | 30 | 519 | 12321 | 3.9566474  | 0.99999509 | 0.37510973 | 36.2640786 |
| GOTERM_BP_DIRECT GO:0030154~cell di 3 | 0.06574622 | 0.04261254 | NOTCH2, NOTCH1, LGALS3          | 30 | 140 | 12321 | 8.80071429 | 0.99999992 | 0.45382775 | 45.2115406 |
| GOTERM_BP_DIRECT GO:0097150~neuror 2  | 0.04383081 | 0.04381693 | NOTCH1, JAG1                    | 30 | 19  | 12321 | 43.2315789 | 0.99999995 | 0.45123161 | 46.1562152 |
| GOTERM_BP_DIRECT GO:0048661~positiv 2 | 0.04383081 | 0.04607098 | NOTCH3, CCL5                    | 30 | 20  | 12321 | 41.07      | 0.99999998 | 0.45659766 | 47.8837322 |
| GOTERM_BP_DIRECT GO:2001240~negati 2  | 0.04383081 | 0.05726448 | GFRAL, GDNF                     | 30 | 25  | 12321 | 32.856     | 1          | 0.52150945 | 55.726419  |
| GOTERM_BP_DIRECT GO:0034097~respon 2  | 0.04383081 | 0.06170629 | TIMP2, TIMP1                    | 30 | 27  | 12321 | 30.4222222 | 1          | 0.53720485 | 58.5232123 |
| GOTERM_BP_DIRECT GO:0002548~monoc 2   | 0.04383081 | 0.0639196  | LGALS3, CCL5                    | 30 | 28  | 12321 | 29.3357143 | 1          | 0.53886723 | 59.854801  |
| GOTERM_BP_DIRECT GO:0030155~regula 2  | 0.04383081 | 0.0639196  | ICAM1, JAG2                     | 30 | 28  | 12321 | 29.3357143 | 1          | 0.53886723 | 59.854801  |
| GOTERM_BP_DIRECT GO:0030900~forebr 2  | 0.04383081 | 0.0639196  | NOTCH3, NOTCH1                  | 30 | 28  | 12321 | 29.3357143 | 1          | 0.53886723 | 59.854801  |
| GOTERM_BP_DIRECT GO:2001237~negati 2  | 0.04383081 | 0.06612788 | NRP1, LGALS3                    | 30 | 29  | 12321 | 28.3241379 | 1          | 0.54042442 | 61.1437431 |
| GOTERM_BP_DIRECT GO:0043406~positiv 2 | 0.04383081 | 0.07709402 | HRAS, VEGFA                     | 30 | 34  | 12321 | 24.1588235 | 1          | 0.58723082 | 66.9949515 |
| GOTERM_BP_DIRECT GO:0045665~negati 2  | 0.04383081 | 0.09652056 | NOTCH3, JAG1                    | 30 | 43  | 12321 | 19.1023256 | 1          | 0.66294885 | 75.4007129 |
